# Supplementary material for: LG5, a Novel Allele of EUI1, Regulates Grain Size and Flag Leaf Angle in Rice
Source: MDPI journal article supplement (doi:10.3390/plants12030675), 2023-02-03

**Table S1.** Sequences of primers used in this study

| Name    | Primer sequence (5' to 3') | Usage            |
|---------|----------------------------|------------------|
| RM18985 | TTGCTTTGGAACCCACACTCC      | Genetic analysis |
|         | GGATATCATCATCTCGTCGTCACC   |                  |
|         | GAGGTGGCGTTCTTGATGAGC      |                  |
| RM18893 | CATGCAGCTTTCACCTCAACTGG    |                  |
|         | CAAATTGCTAGAGCCTACCTTTCC   |                  |
| RM18895 | CGACTGTCTTTCAATACCGATGC    |                  |
|         | CTCCCAAAGGTCCTGGGAGAGC     |                  |
| RM18900 | CCCAAATCACACATACAGCCTCTCG  |                  |
|         | GGTGTCGCTTGTC AATTGTGTACC  |                  |
| RM18882 | AGCTATCAGGAGACGACCCAAGG    |                  |
|         | GAGAGGCATTTCCTCGAACACC     |                  |
| RM18883 | ATTGCAATCTCCCTTCACAACG     |                  |
|         | CATCATGTGGTAAGTGTGCAACG    |                  |
| RM18639 | GGTTGCGATGAGATTACGAGACC    |                  |
|         | CAGCCTTGGTAGCTGGATAATCG    |                  |
| RM18717 | CGTCTACTGCTCGAGAGAACTGTGG  |                  |
|         | TTGGTGGTGTAGATTTCGGAGTGG   |                  |
| RM18803 | TCCTCCTCCTCCAAGAAACAATCC   |                  |
|         | CGGCTAAATCGTCATGTGTATGG    |                  |
| RM18821 | TCTCCCATCTTACATGTCCTCACC   |                  |
|         | GCTGGCTAAGCTAAGGCTATACCG   |                  |
| RM18847 | ATCTAGCTAGCAAGGAGGCAAGG    |                  |
|         | CCATGAATGATCGGAGATGAGAGC   |                  |
| RM18903 | CTCGTGCCACAGGTCCTTCC       | qRT-PCR          |
|         | CGCTCCGAAGTCTTCCTTCC       |                  |
| RM18958 | GTA CTCCCTCATCCTCGTTTCG    |                  |
|         | TCGTTGCACTGAAGCAGACATGC    |                  |
| RM19013 | GTCCTTGCCGCCAAAGAATGG      |                  |
|         | CCTGATGATCCATGAAGTACAGACC  |                  |
| RM19130 | GAGGATTGCATTGACCGCTACC     |                  |
| GW2     | CAGCAGCGCATTCCCAGTTTTTC    |                  |
|         | GTGGTCAGCCGAGCACTCTC       |                  |
| GL3.1   | GCTCAAGGTCACCTGATCACTC     |                  |
|         | GAACGACCACAAGATCTCTGC      |                  |
| GL7/GW7 | CCCCTAGCATCGACACCAAG       |                  |
|         | CGGGTTCCAGCACTCCTCT        |                  |
| TGW6    | GGATTGATGCGAGTTGGT         |                  |
|         | GGATTGAAGAACGGTGACT        |                  |
| GS2/GL2 | TGCGTCCCTTCTTTGATGAGT      |                  |
|         | ACAGTTGGGTGCCTGAGAATG      |                  |
| GS5     | AGTGGACTGCTTCAGGGAAG       |                  |

|           |                                                                                         |                                         |
|-----------|-----------------------------------------------------------------------------------------|-----------------------------------------|
|           | CACGCAGTACCGAGAACTGA<br>GTTTCGGTTGACGAGACGATGT<br>CGCTGCAAGGAACCTAGAACTG                |                                         |
| CYCA1;1   |                                                                                         |                                         |
|           | AGGTTGTCAAGATGGAGAGCGA<br>CGCTTTTTGTCTTCCTGGCA                                          |                                         |
| CYCA3;2   |                                                                                         |                                         |
|           | GGATTTACCGAGTCACAGCT<br>CAAGCGTGTCAAGATTCCAA                                            |                                         |
| CYCB1;1   |                                                                                         |                                         |
|           | CTCAAGGCTGCACAATCTGACA<br>GCATTGACGGCTGGAATTTG                                          |                                         |
| CYCB2;2   |                                                                                         |                                         |
|           | CGAGATTTGAAGCCCCAGAA<br>TCCGCGAGCTTCAATGAGTT                                            |                                         |
| CDKA2     |                                                                                         |                                         |
|           | AAGTTTGGCCAGGAGTGAGCA<br>TCAAGAGCATCAGCGTCGAGA                                          |                                         |
| CDKB2;1   |                                                                                         |                                         |
| LG5-Com1  | ttcgagctcgggtaccAGCTACCCACAGCCAGCTATATG<br>cgaagctgggcccggcCGTCAGGCCACCGATTGATCT        | Complementary<br>vector<br>construction |
| LG5-Com2  | atcgggtggcctgacgGCCGGCCCAGCTTCGATT<br>ctaattaacccatgaTTATCCTATGTGATGCTACATT             |                                         |
| LG5-Com3  | catcacataggataaTCATGGGTAAATTAGGCTC<br>caggtcgactctagaACTGTCTTCAGCACACGTA                |                                         |
| LG5-OE    | tcgcgagctcgggtaccATGGAGAGCTTCTTCGTCTTCT<br>gcctgcaggtcgactctagaTTAATTATGAGAACTATGCACG   | Over-expression<br>construction         |
| LG5-RNAi1 | gacctcgaggggtaccATGGAGAGCTTCTTCGTC<br>gactctagaggatccTTAATTATGAGAACTATGCACG             | RNA<br>interference                     |
| LG5-RNAi2 | cagatcgatactagtATGGAGAGCTTCTTCGTC<br>gggaaattcgagctcTTAATTATGAGAACTATGCACG              |                                         |
| LG5-GFP   | gagggggggcccgggtaccATGGAGAGCTTCTTCGTCTTC<br>cccttgctcaccatgggtaccATTATGAGAACTATGCACGGGT | Subcellular<br>localization             |

---

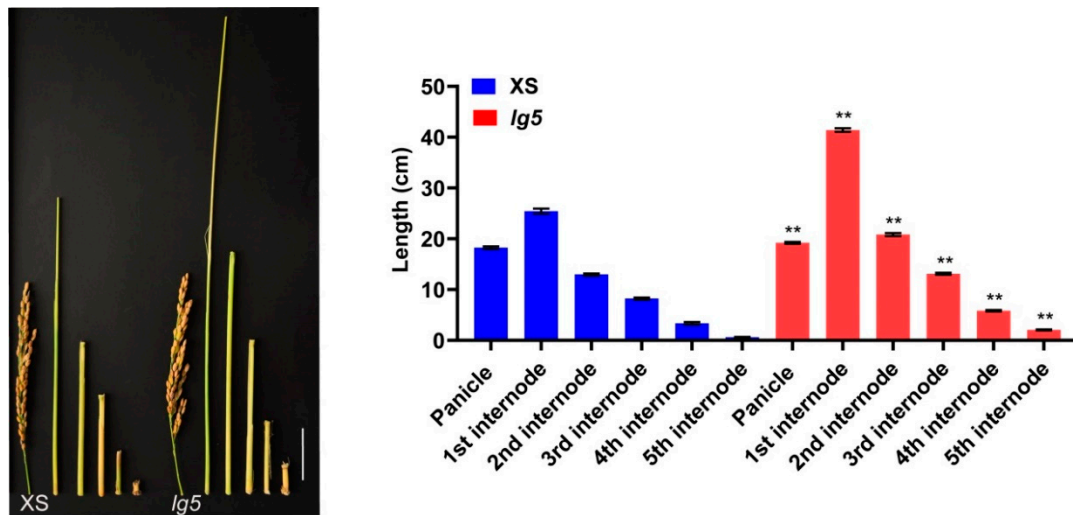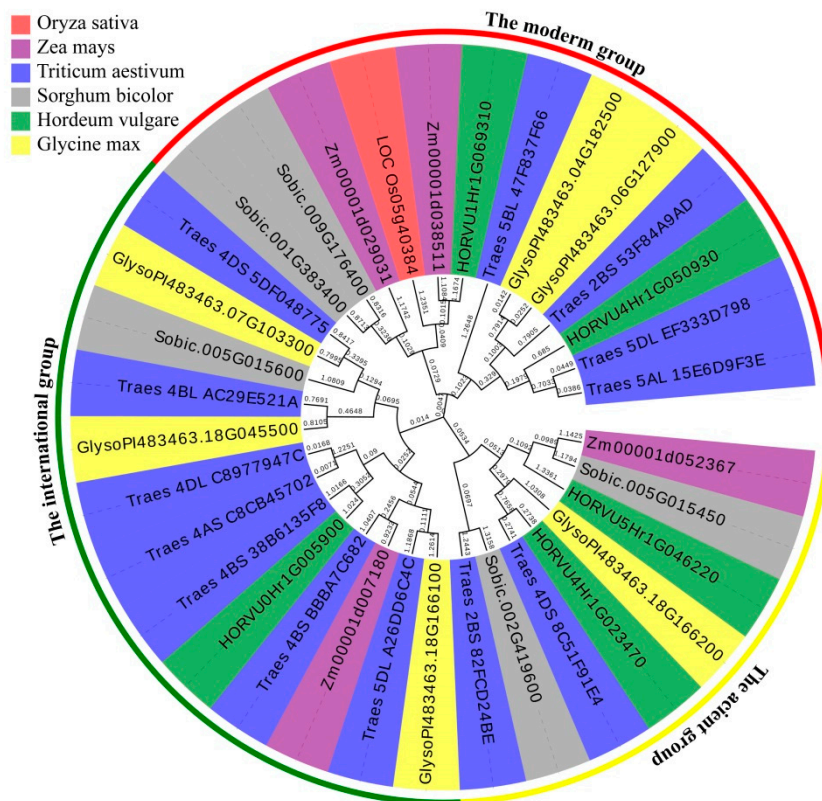

Supplement: s1 [file s1]
